# Supplementary material for: Current practices in patient-reported outcome (PRO) data collection in clinical trials: a cross-sectional survey of UK trial staff and management
Source: PubMed Central journal article supplement (PMC5073494; doi:10.1136/bmjopen-2016-012281), 2016-10-03
Supplement: bmjopen-2016-012281supp3.pdf [file bmjopen-2016-012281supp3.pdf]

**Supplementary File 3 - Logistic Regression Results**

|                                          |                    |           |          |           | <b>95% CI for OR</b> |              |
|------------------------------------------|--------------------|-----------|----------|-----------|----------------------|--------------|
|                                          | <b>Coefficient</b> | <b>SE</b> | <b>P</b> | <b>OR</b> | <b>Lower</b>         | <b>Upper</b> |
| <b>Constant</b>                          | -0.889             | 0.961     |          |           |                      |              |
| ≥10 years experience as a research nurse | 0.814              | 0.386     | 0.035    | 2.258     | 1.059                | 4.815        |

CI, confidence interval; OR, odds ratio, SE, standard error. (Full model presented in below)

## Appendix 2

### Full Logistic Regression Model

| Variables in the Equation                     |         |           |       |    |       |           |                     |        |  |
|-----------------------------------------------|---------|-----------|-------|----|-------|-----------|---------------------|--------|--|
|                                               | B       | S.E.      | Wald  | df | Sig.  | Exp(B)    | 95% C.I. for EXP(B) |        |  |
|                                               |         |           |       |    |       |           | Lower               | Upper  |  |
| Step 1 <sup>a</sup>                           |         |           |       |    |       |           |                     |        |  |
| Research_Role(1)                              | .667    | .879      | .575  | 1  | .448  | 1.948     | .348                | 10.918 |  |
| Research_Experience                           |         |           | 5.659 | 4  | .226  |           |                     |        |  |
| Research_Experience(1)                        | -.442   | 1.227     | .130  | 1  | .719  | .643      | .058                | 7.122  |  |
| Research_Experience(2)                        | -20.314 | 28420.777 | .000  | 1  | .999  | .000      | .000                | .      |  |
| Research_Experience(3)                        | -20.099 | 40193.049 | .000  | 1  | 1.000 | .000      | .000                | .      |  |
| Research_Experience(4)                        | .814    | .386      | 4.444 | 1  | .035  | 2.258     | 1.059               | 4.815  |  |
| Trial_Protocol(1)                             | .028    | .347      | .007  | 1  | .935  | 1.029     | .521                | 2.032  |  |
| Trial_Training(1)                             | .617    | 1.315     | .220  | 1  | .639  | 1.854     | .141                | 24.405 |  |
| Research_Experience *<br>Research_Role        |         |           | 1.000 | 3  | .801  |           |                     |        |  |
| Research_Experience(1)<br>by Research_Role(1) | 1.190   | 1.190     | 1.000 | 1  | .317  | 3.286     | .319                | 33.826 |  |
| Research_Experience(2)<br>by Research_Role(1) | 20.623  | 28420.777 | .000  | 1  | .999  | 904623446 | .000                | .      |  |
| Research_Experience(3)<br>by Research_Role(1) | 20.592  | 40193.049 | .000  | 1  | 1.000 | 876813138 | .000                | .      |  |
| Trial_Protocol(1) by<br>Trial_Training(1)     | -.860   | 1.332     | .417  | 1  | .519  | .423      | .031                | 5.759  |  |
| Constant                                      | -.889   | .961      | .855  | 1  | .355  | .411      |                     |        |  |

a. Variable(s) entered on step 1: Research\_Role, Research\_Experience, Trial\_Protocol, Trial\_Training, Research\_Experience \*  
Research\_Role , Trial\_Protocol \* Trial\_Training .

Key: Research\_Role, Research\_Experience, number of years of research experience (1=0 to 3 years, 2=4 to 6 years, 3=7 to 10 years, 4= 10+ years); Trial\_Protocol, whether PRO-specific information was reportedly included in the trial protocol (1=yes); Trial\_Training, whether PRO-specific information was reportedly included in trial training (1=yes)
